# Supplementary material for: Enrichment analysis with EpiAnnotator
Source: Oxford University Press journal article supplement (doi:10.1093/bioinformatics/bty007), 2018-01-09
Supplement: bioinformatics_34_10_1781_s1.pdf [file bioinformatics_34_10_1781_s1.pdf]

# EPIANNOTATOR

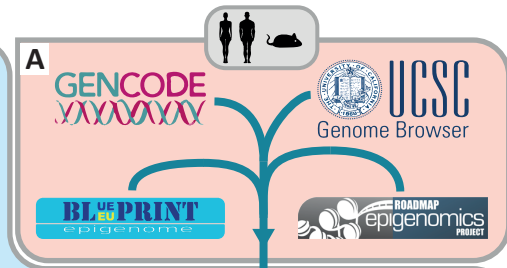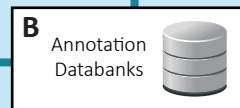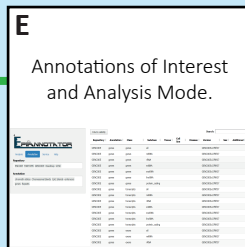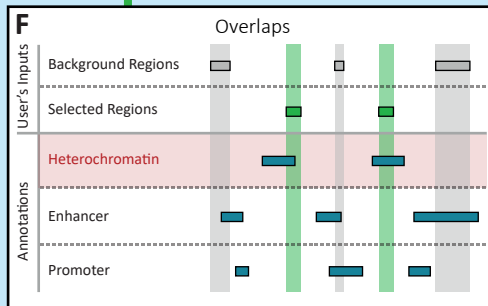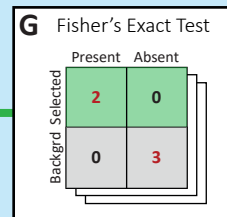

**C** User's Selected and Background Genomic Regions

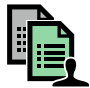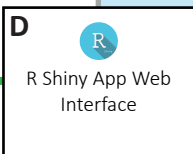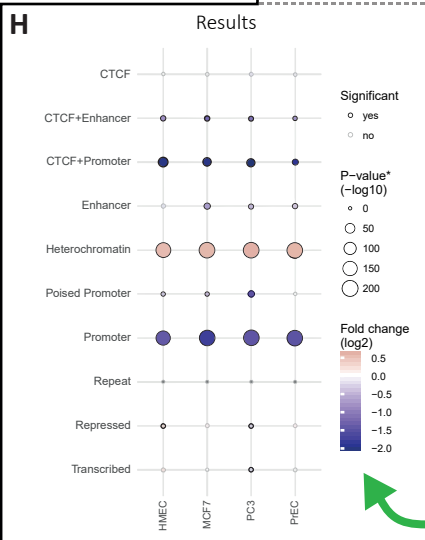

Visualize and Export

P-value and Fold Change
